# Supplementary material for: Structural effect of phenylcarbazole-based molecules on the exciplex-forming co-host system to achieve highly efficient phosphorescent OLEDs with low efficiency roll-off
Source: Royal Society of Chemistry journal article supplement (doi:10.1039/d1tc02290c), 2021-01-01
Supplement: d1tc02290c1.pdf [file d1tc02290c1.pdf]

## Electronic Supplementary Information

# Structural Effect of Phenylcarbazole-based Molecules on the Exciplex-Forming Co-Host System to Achieve High Efficient Phosphorescent OLEDs with Low Efficiency Roll-off

Chih-Chien Lee<sup>a</sup>, Nurul Ridho Al Amin<sup>a,b,c</sup>, Jing-Jie Xu<sup>d</sup>, Bo-Cheng Wang<sup>d</sup>, Dian Luo<sup>b</sup>, Kevin  
Sutanto<sup>b,c</sup>, Sajal Biring<sup>b,c</sup>, Shun-Wei Liu<sup>b,c\*</sup>, Chih-Hsin Chen<sup>d\*</sup>

<sup>a</sup>Department of Electronic Engineering, National Taiwan University of Science and Technology,  
Taipei 10617, Taiwan

<sup>b</sup>Organic Electronics Research Center, Ming Chi University of Technology, New Taipei City  
24301, Taiwan

<sup>c</sup>Department of Electronic Engineering, Ming Chi University of Technology, New Taipei City  
24301, Taiwan

<sup>d</sup>Department of Chemistry, Tamkang University, New Taipei City 251, Taiwan

\*Corresponding authors: [chc@mail.tku.edu.tw](mailto:chc@mail.tku.edu.tw) (Chih-Hsin Chen)  
[swliu@mail.mcut.edu.tw](mailto:swliu@mail.mcut.edu.tw) (Shun-Wei Liu)

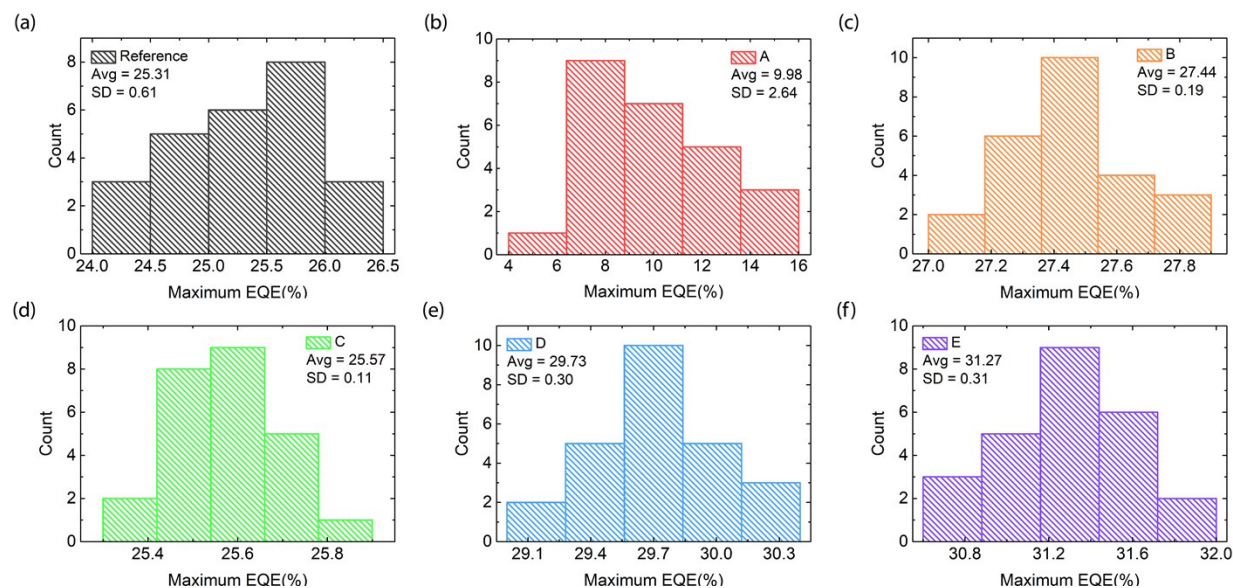

**Figure S1.** Stability data of the devices: (a) BCzPh denoted as reference device, (b) PhCNCzp-Me denoted as device A, (c) PhCzp-Me denoted as device B, (d) PHCNCzp-MeCzPh denoted as device C, (e) PhCzm-Me denoted as device D, and (f) PhCNCzm-MeCzPh denoted as device E

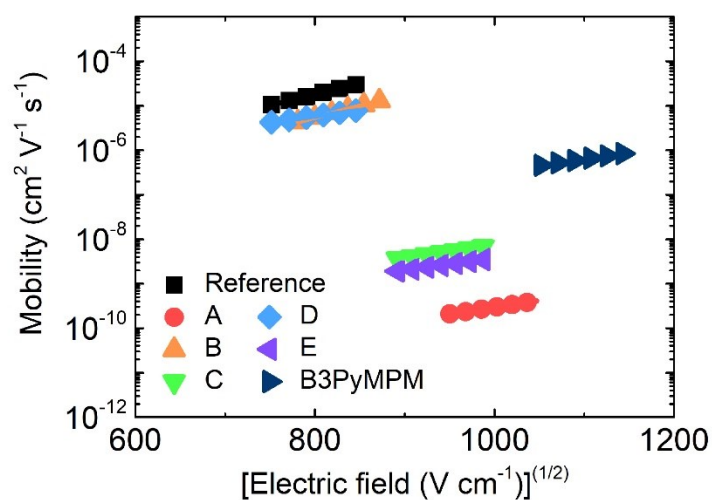

**Figure S2.** Hole and/or electron mobility of each material versus applied voltages.

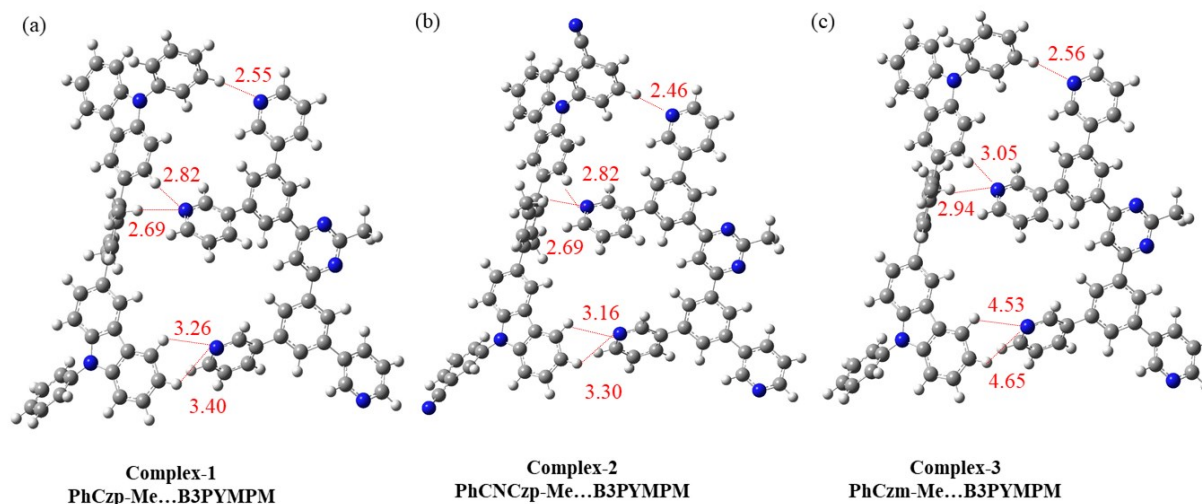

**Figure S3.** Bimolecular simulation for the structure of the exciplex formed by B3PyMPM and (a) PhCzp-Me, (b) PhCNCzp-Me, (c) PhCzm-Me.

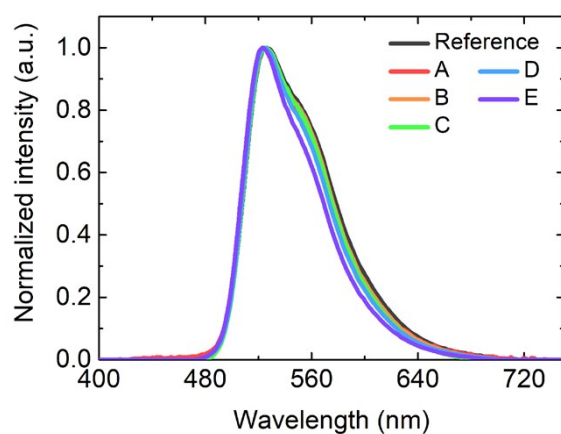

**Figure S4.** Normalized electroluminescence (EL) spectrum of the devices under test.

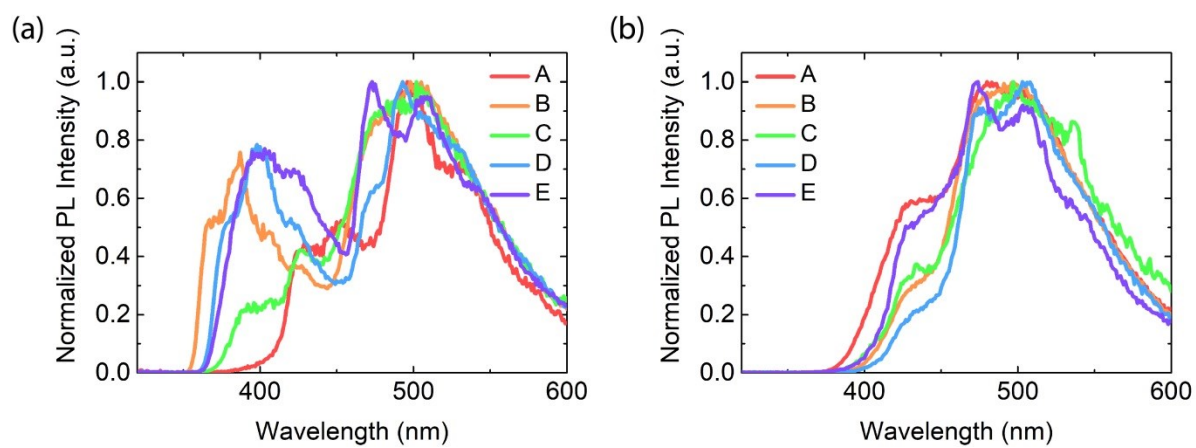

**Figure S5.** Low temperature PL spectrum of (a) PhCzs only, and (b) PhCzs:B3PyMPM blend.

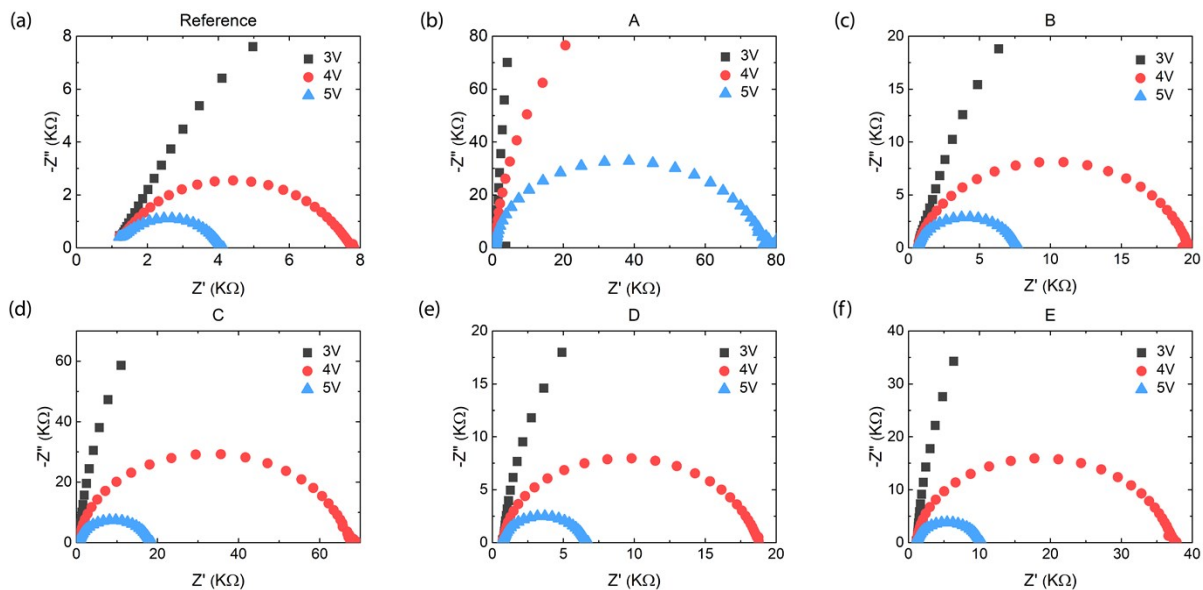

**Figure S6.** Impedance spectrum of: (a) reference device, (b) device A, (c) device B, (d) device C, (e) device D, and (f) device E.

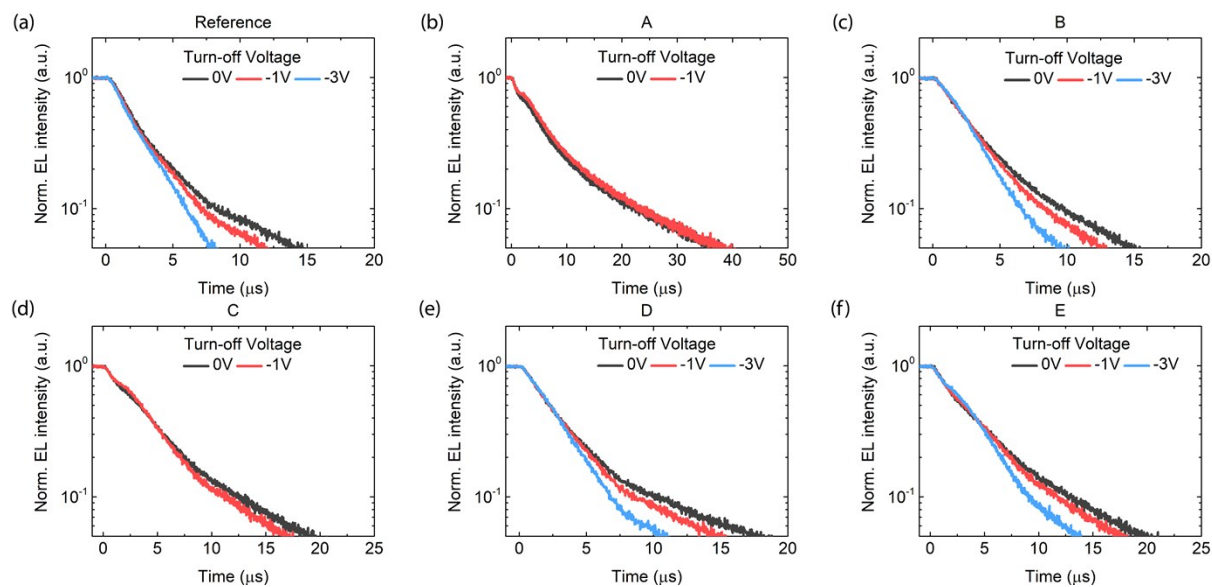

**Figure S7.** Transient electroluminescent (TREL) data of: (a) reference device, (b) device A, (c) device B, (d) device C, (e) device D, and (f) device E.

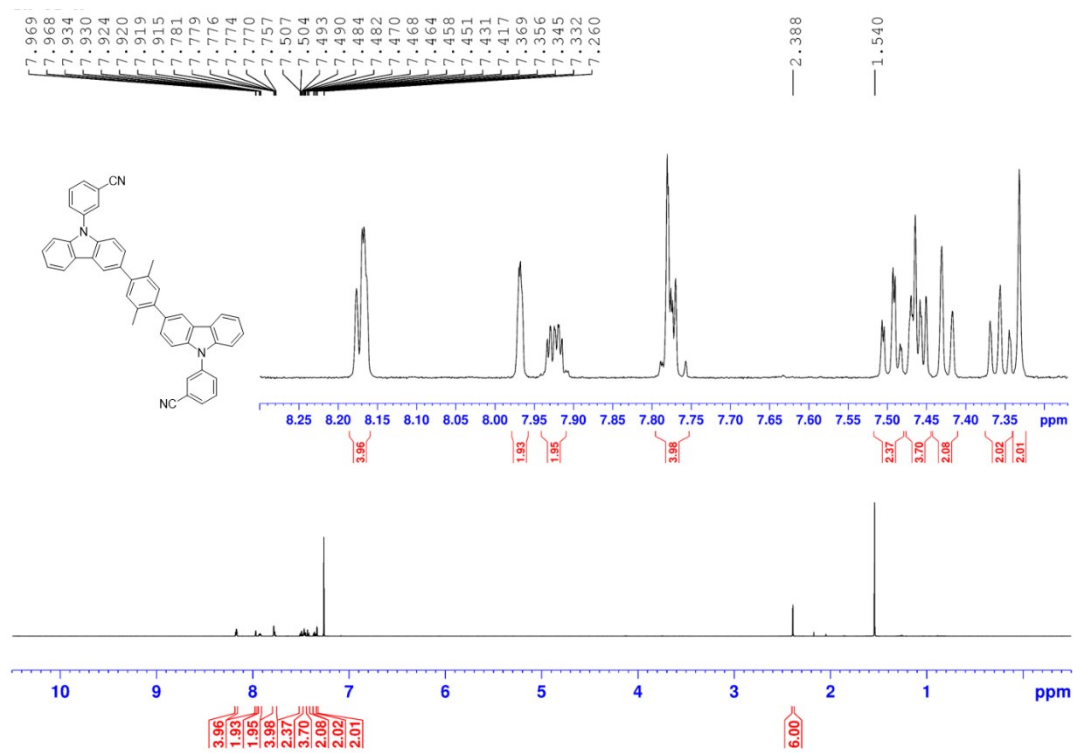

**Figure S8.** <sup>1</sup>H NMR spectrum of isolated compound PhCNCzp-Me in CDCl<sub>3</sub>.

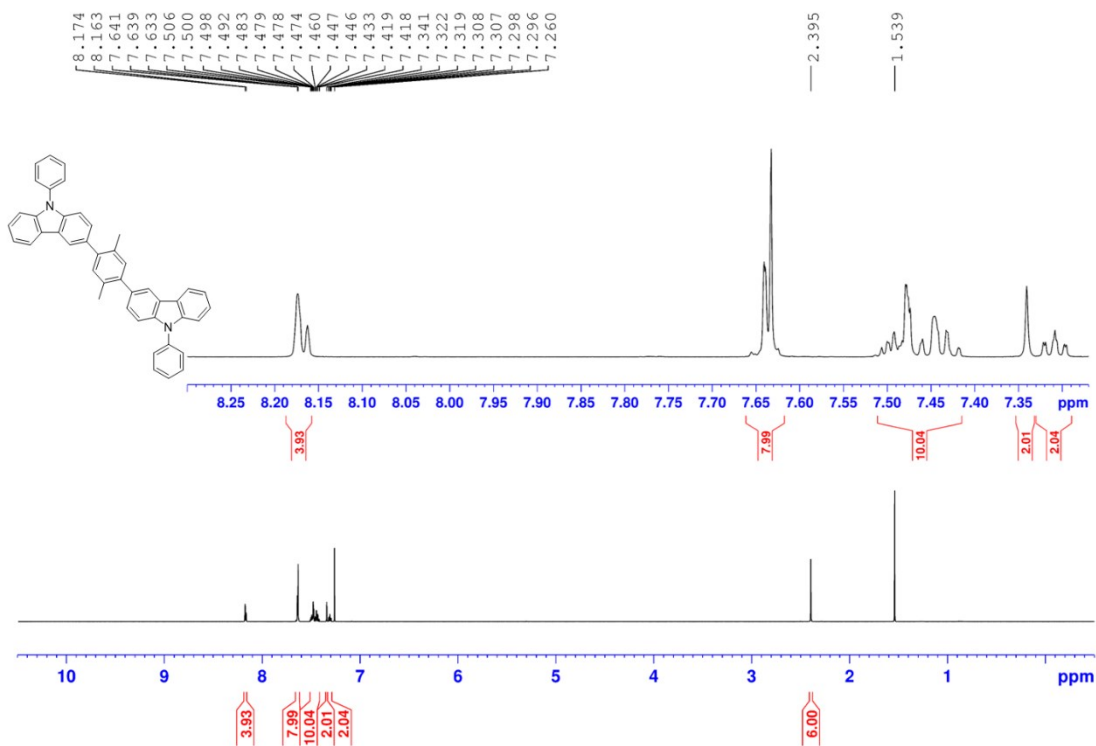

**Figure S9.** <sup>1</sup>H NMR spectrum of isolated compound PhCzp-Me in CDCl<sub>3</sub>.

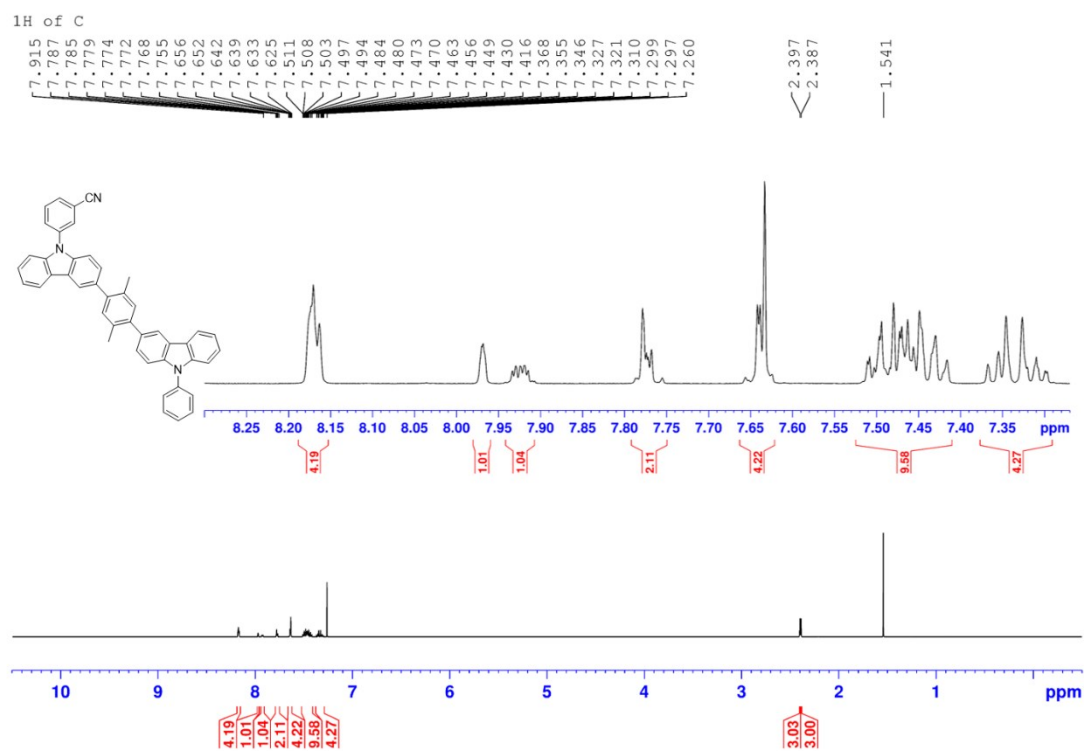

**Figure S10.** <sup>1</sup>H NMR spectrum of isolated compound PhCNCzp-MeCzPh in CDCl<sub>3</sub>

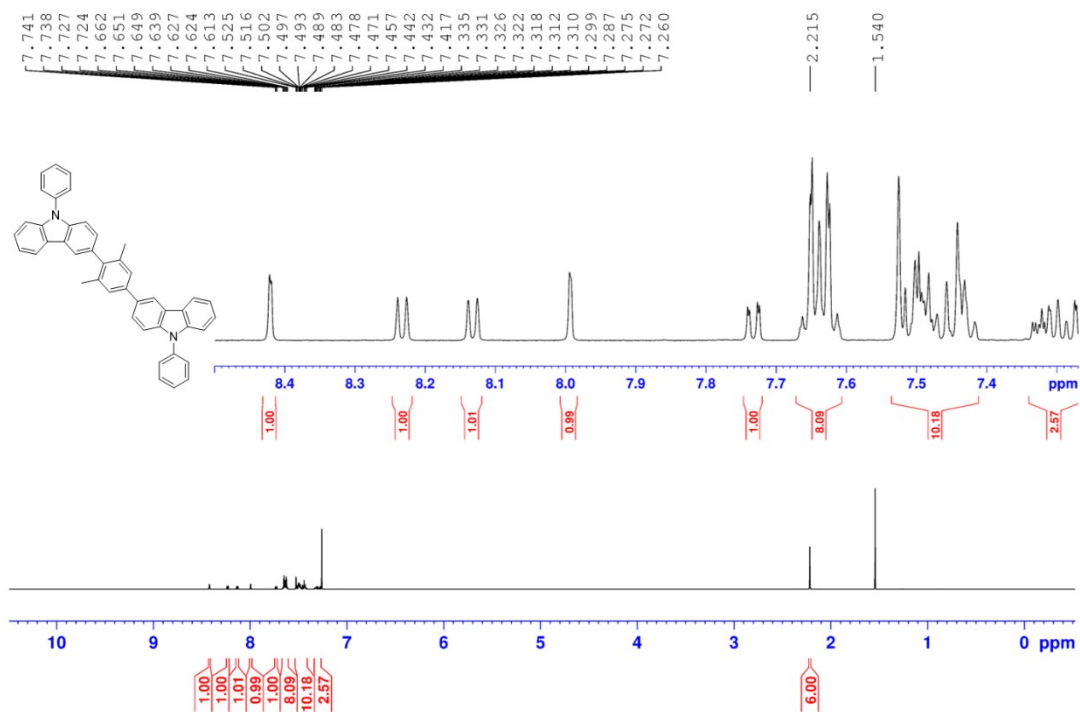

**Figure S11.** <sup>1</sup>H NMR spectrum of isolated compound PhCzm-Me in CDCl<sub>3</sub>



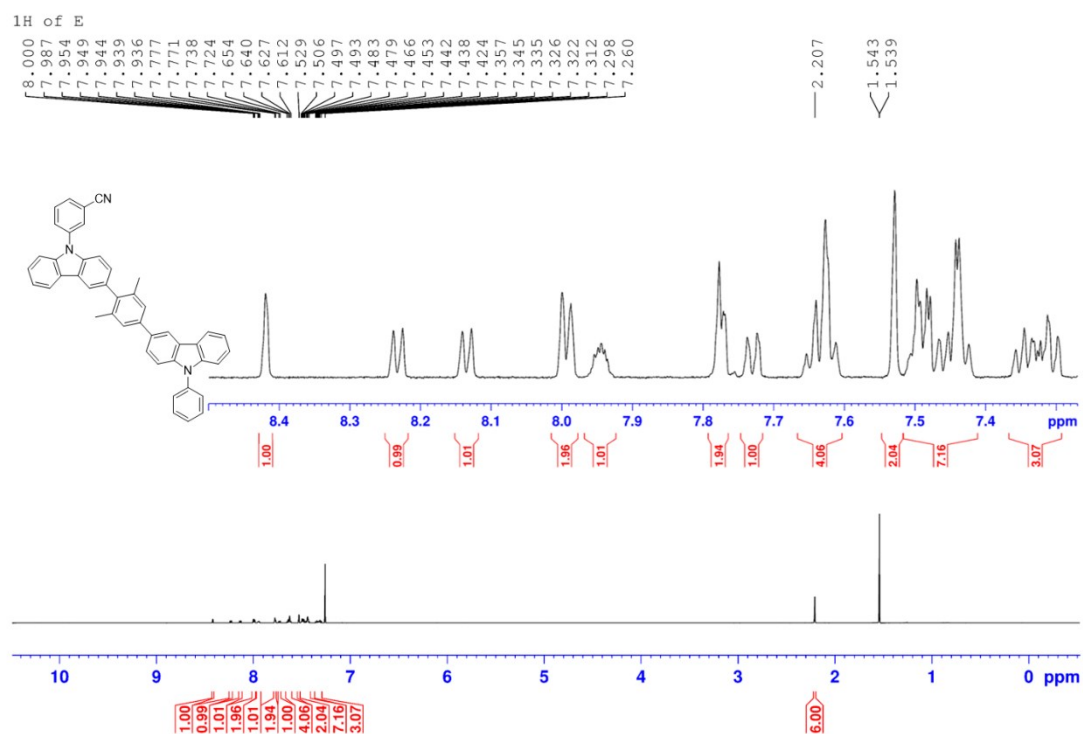

**Figure S12.** <sup>1</sup>H NMR spectrum of isolated compound PhCNCzm-MeCzPh in CDCl<sub>3</sub>

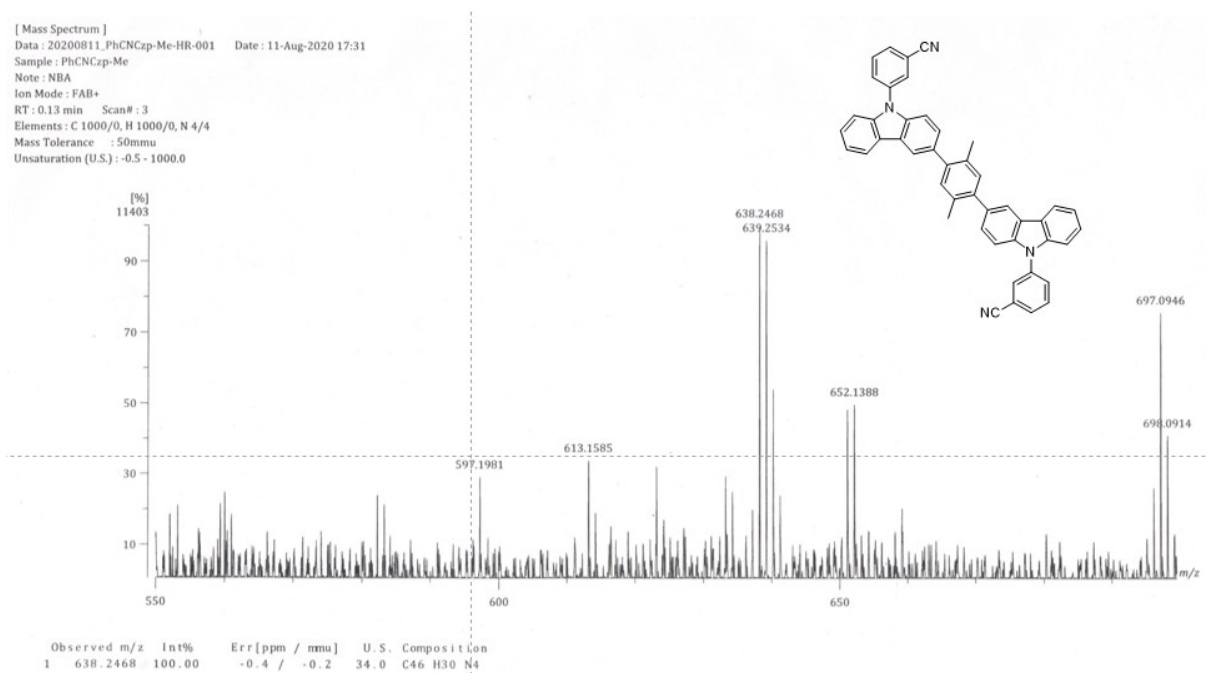

**Figure S13.** Mass spectrum of compound PhCNCzp-Me



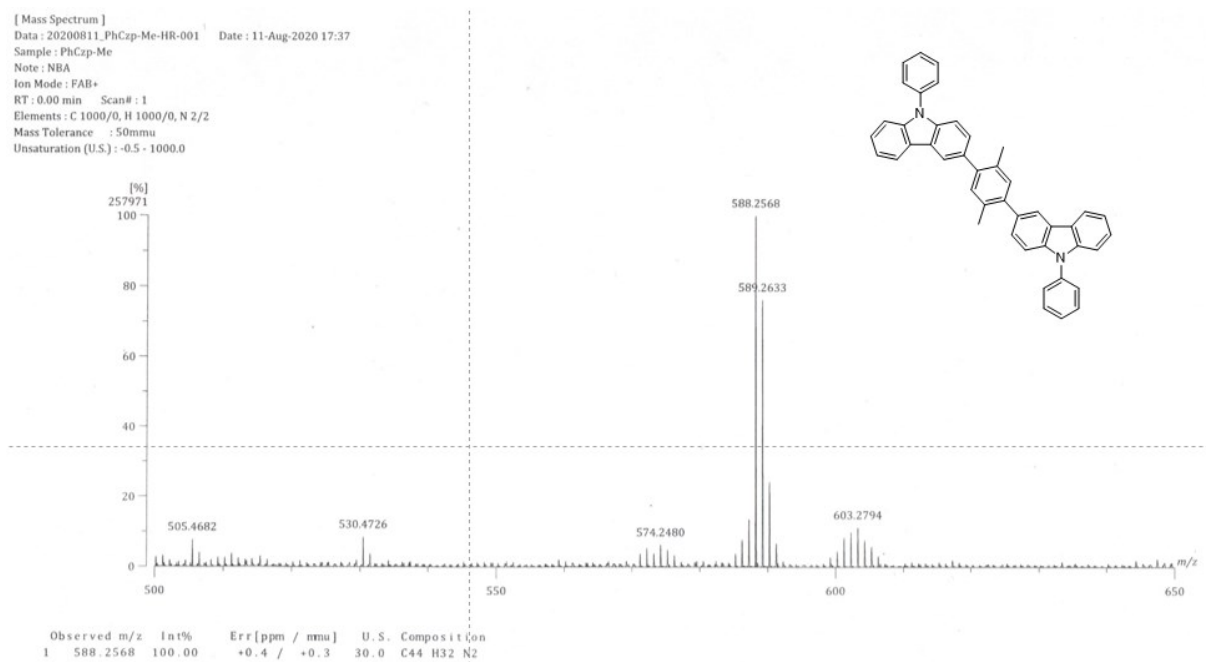

**Figure S14.** Mass spectrum of compound PhCzp-Me.

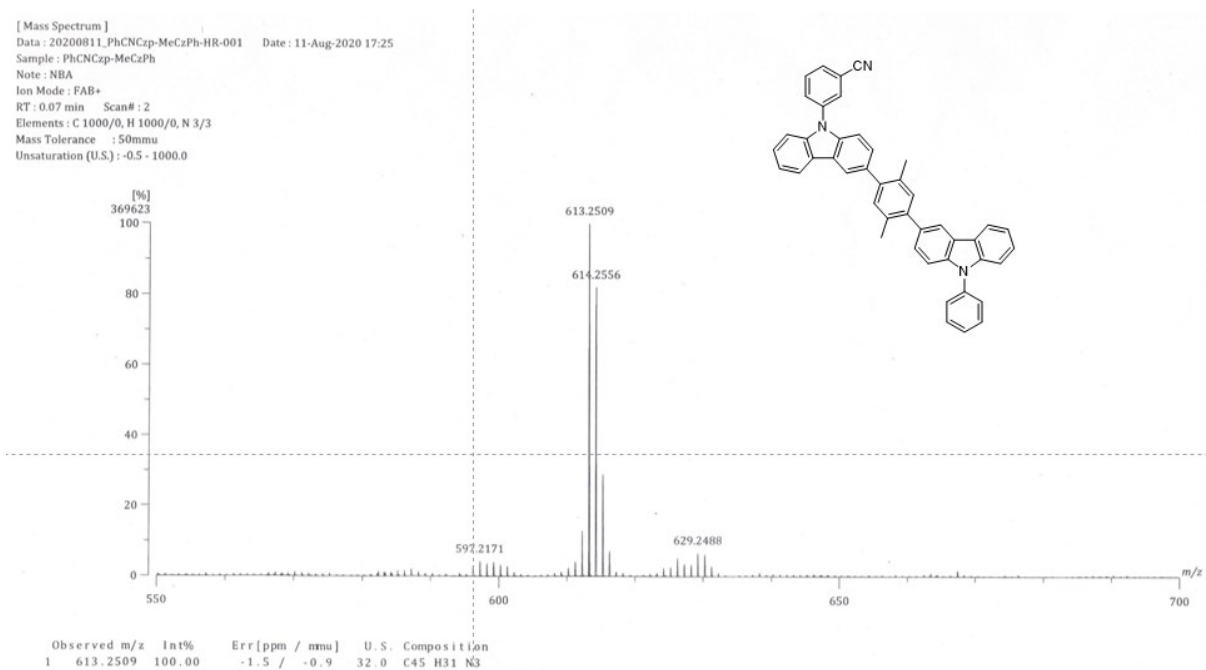

**Figure S15.** Mass spectrum of compound PhCNCzp-MeCzPh.

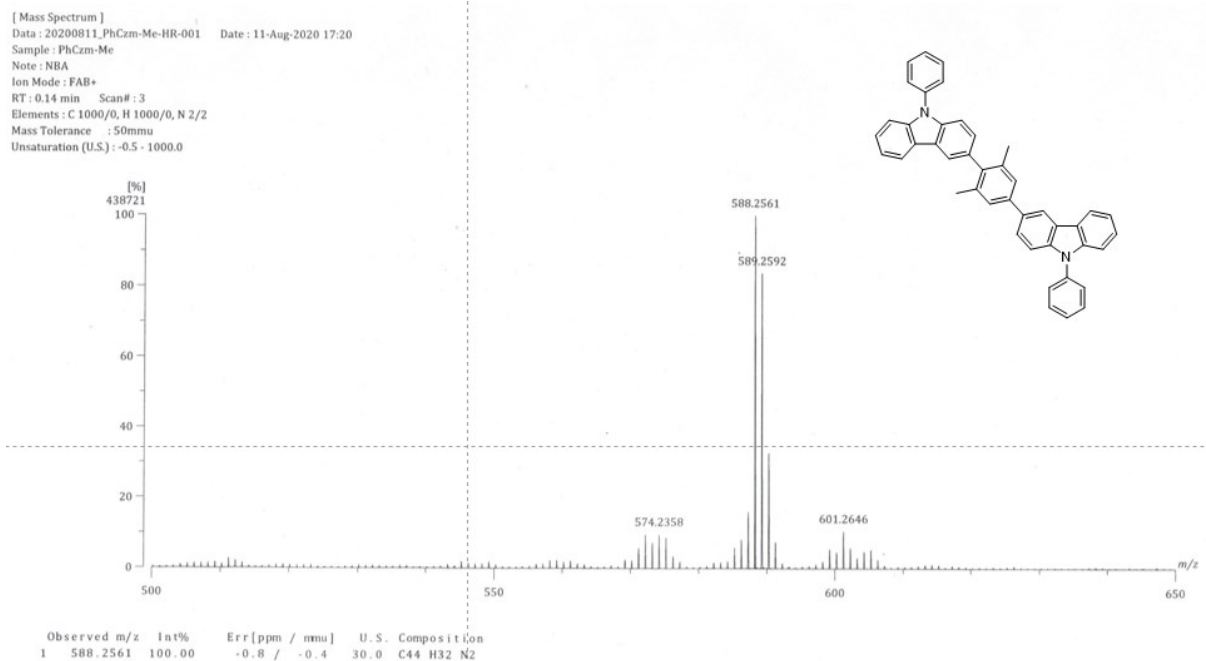

**Figure S16.** Mass spectrum of compound PhCzm-Me.

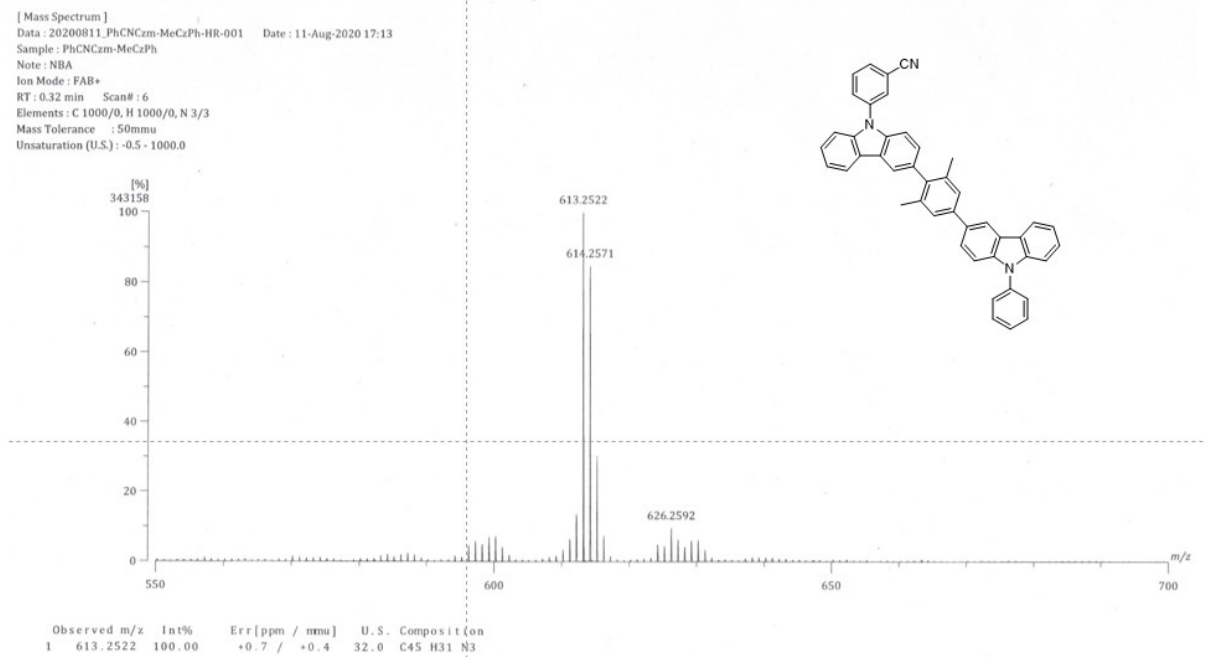

**Figure S17.** Mass spectrum of compound PhCNCzm-MeCzPh.

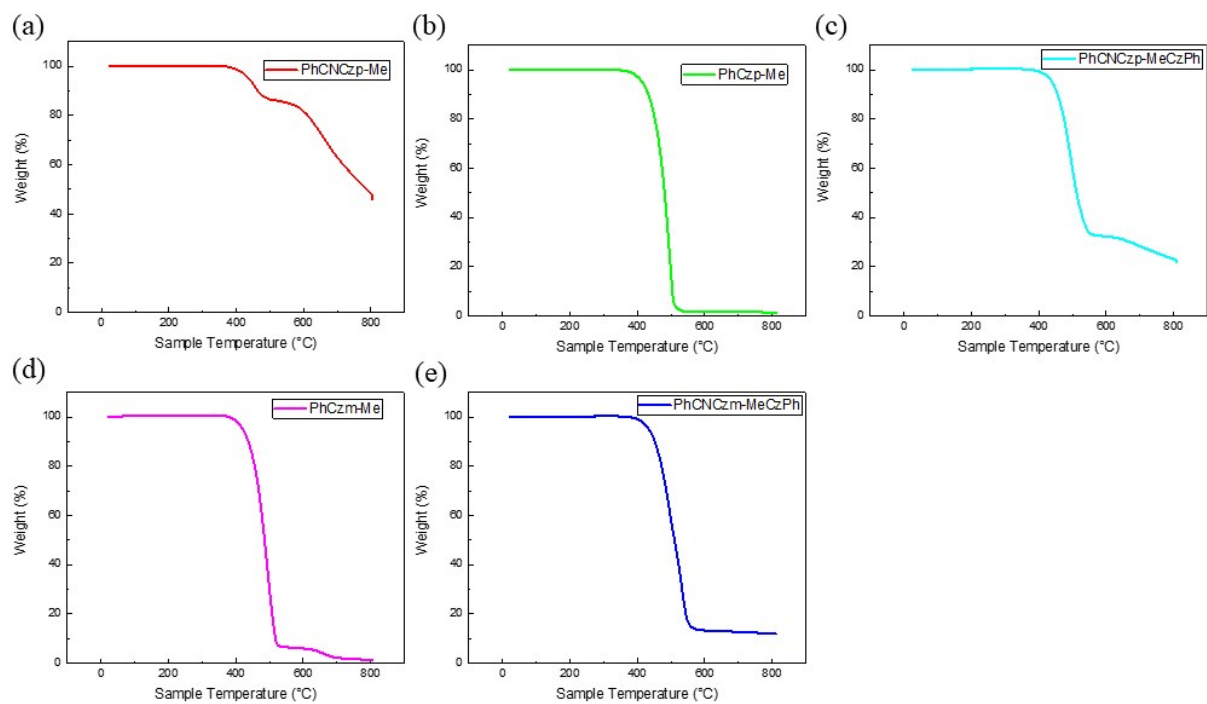

**Figure S18.** The TGA thermogram of (a) PhCNCzp-Me, (b) PhCzp-Me, (c) PhCNCzp-MeCzPh, (d) PhCzm-Me, (e) PhCNCzm-MeCzPh.
